# Supplementary material for: Exosomes Derived from Dermal Papilla Cells Mediate Hair Follicle Stem Cell Proliferation through the Wnt3a/β‐Catenin Signaling Pathway
Source: Hindawi journal article supplement (doi:10.1155/2022/9042345), 2022-01-01

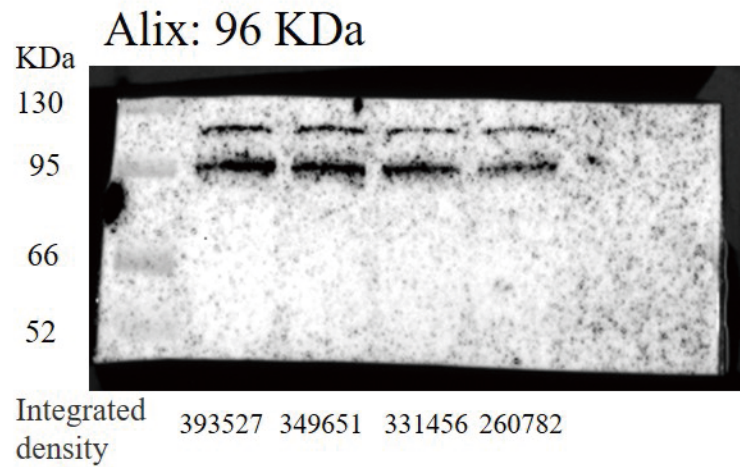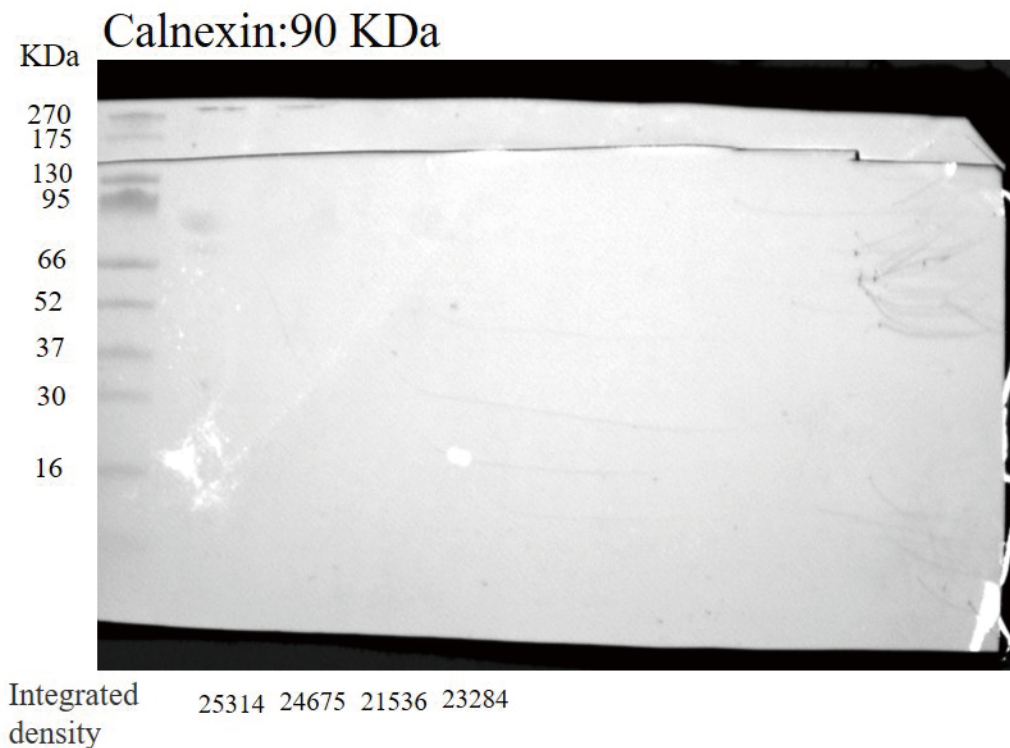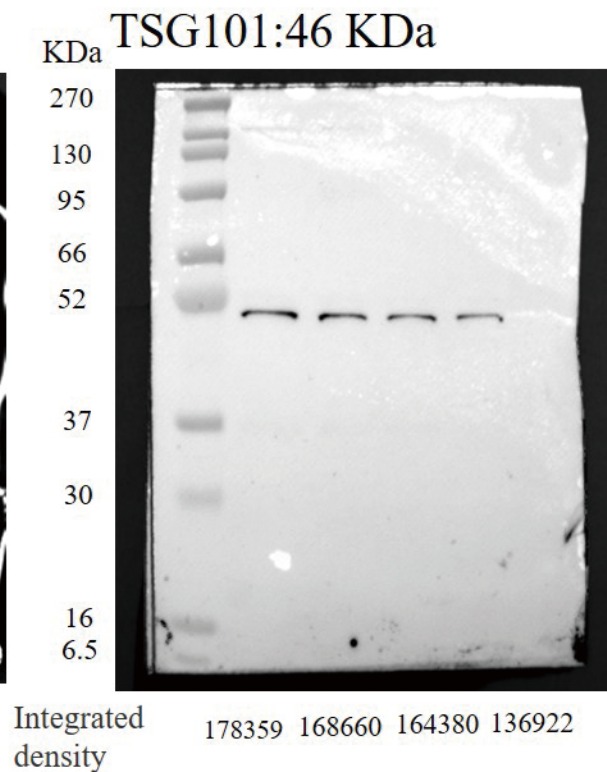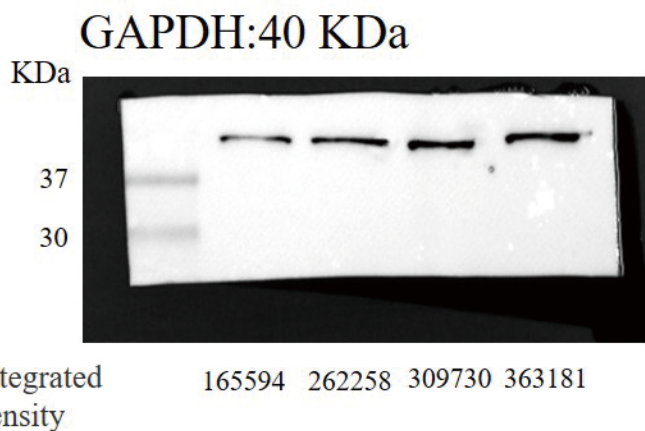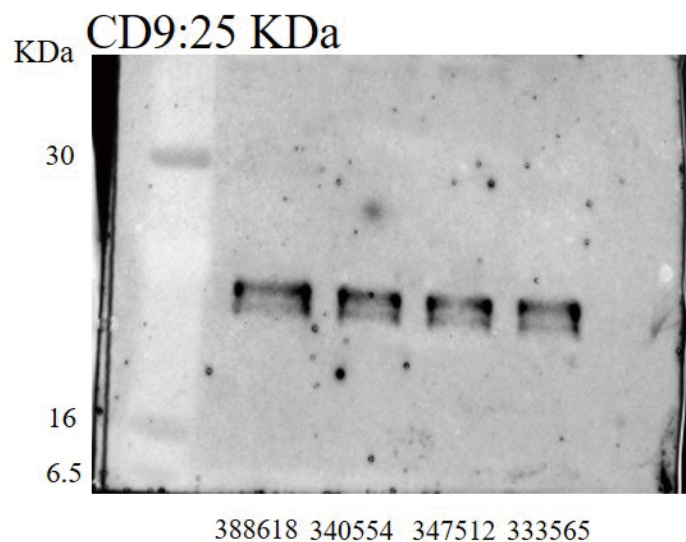

Supplement: f1 [file 9042345.f1.pdf]
